## **Enumerating the Economic Cost of Antimicrobial Resistance Per Antibiotic Consumed to Inform the Evaluation of Interventions Affecting their Use**

Poojan Shrestha<sup>1,2†</sup>, Ben S Cooper<sup>2,3</sup>, Joanna Coast<sup>4</sup>, Raymond Opong<sup>5</sup>, Nga Do Thi Thuy<sup>6,7</sup>, Tuangrat Phodha<sup>8</sup>, Philippe J Guerin<sup>1,2</sup>, Heiman Wertheim<sup>6,9</sup>, Yoel Lubell<sup>2,3\*</sup>

<sup>1</sup> Infectious Diseases Data Observatory, University of Oxford, United Kingdom

<sup>2</sup> Centre for Tropical Medicine and Global Health, Nuffield Department of Medicine, University of Oxford, United Kingdom

<sup>3</sup> Mahidol Oxford Tropical Medicine Research Unit, Bangkok, Thailand

<sup>4</sup> School of Social and Community Medicine, University of Bristol, Bristol, UK

<sup>5</sup> Health Economics Unit, School of Health and Population Sciences, University of Birmingham, Birmingham

<sup>6</sup> Oxford University Clinical Research Unit-Ha Noi, Ha Noi, Vietnam

<sup>7</sup> National Hospital for Tropical Diseases, Hanoi, Vietnam

<sup>8</sup> Faculty of Pharmacy, Mahidol University, Bangkok, Thailand

<sup>9</sup> Department of Medical Microbiology, Radboud Center of Infectious Diseases, Radboudumc, Nijmegen, Netherlands

**Keywords:** antimicrobial resistance, antibiotic resistance, cost of resistance, economic cost, economic evaluations

**Running Title:** Economic Cost of Resistance per Antibiotic Consumed

### **Contact Information**

\*Corresponding author contact details: Yoel Lubell, [yoel@tropmedres.ac](mailto:yoel@tropmedres.ac); +66-857201350; Mahidol Oxford Tropical Medicine Research Unit, Faculty of Tropical Medicine, Mahidol University, 420/6 Rajvithi Road, Bangkok 10400, Thailand

†Alternate corresponding author contact details: Poojan Shrestha, [poojan\\_pn12@hotmail.com](mailto:poojan_pn12@hotmail.com); Infectious Diseases Data Observatory, University of Oxford, Oxford, United Kingdom

**Key point:** Estimating the economic costs of resistance incurred by antimicrobial consumption is essential for economic evaluations of interventions that affect their use. This analysis estimates the costs of AMR for a variety of antibiotic drug classes, stratified by country income level.

## Abstract

**Background** – Antimicrobial resistance (AMR) poses a colossal threat to global health and incurs high economic costs to society. Economic evaluations of antimicrobials and interventions such as diagnostics and vaccines that affect their consumption rarely include the costs of AMR, resulting in sub-optimal policy recommendations. We estimate the economic cost of AMR per antibiotic consumed, stratified by drug class and national income level.

**Methods** – The model comprises three components: correlation coefficients between human antibiotic consumption and subsequent resistance; the economic costs of AMR for key pathogens; and consumption data for antibiotic classes driving resistance in these organisms. These were used to calculate the economic cost of AMR per antibiotic consumed for different drug classes, using data from Thailand and the United States to represent low/middle and high income countries.

**Results** – The correlation coefficients between consumption of antibiotics that drive resistance in *S. aureus*, *E. coli*, *K. pneumoniae*, *A. baumannii*, *P. aeruginosa* and *S. pneumoniae* and resistance were 0.37, 0.27, 0.35, 0.45, 0.52 and 0.62 respectively. The economic cost of resistance per standard unit of quinolones, for example, was estimated at \$0.87 in Thailand (\$0.2 - \$2.6 in best and worse-case scenarios) and \$0.83 in the USA (\$0.1 - \$2.4).

**Conclusion** – The economic cost of AMR per antibiotic consumed were considerable, often exceeding their purchase cost. Notwithstanding their limitations, use of these estimates in economic evaluations can make better informed policy recommendations regarding interventions that affect antimicrobial consumption and those aimed specifically at reducing the burden of AMR.

## Introduction

Human antimicrobial consumption, whether or not clinically warranted, is associated with propagation of antimicrobial resistance (AMR) [1–4]. Other key drivers of AMR are listed in Figure 1, notably widespread antibiotic use prophylactically, therapeutically and as growth promoters in agriculture [5–7].

Figure 1 - Drivers and costs associated with antimicrobial resistance. Adapted from: Holmes et al. [3] and McGowan [17]

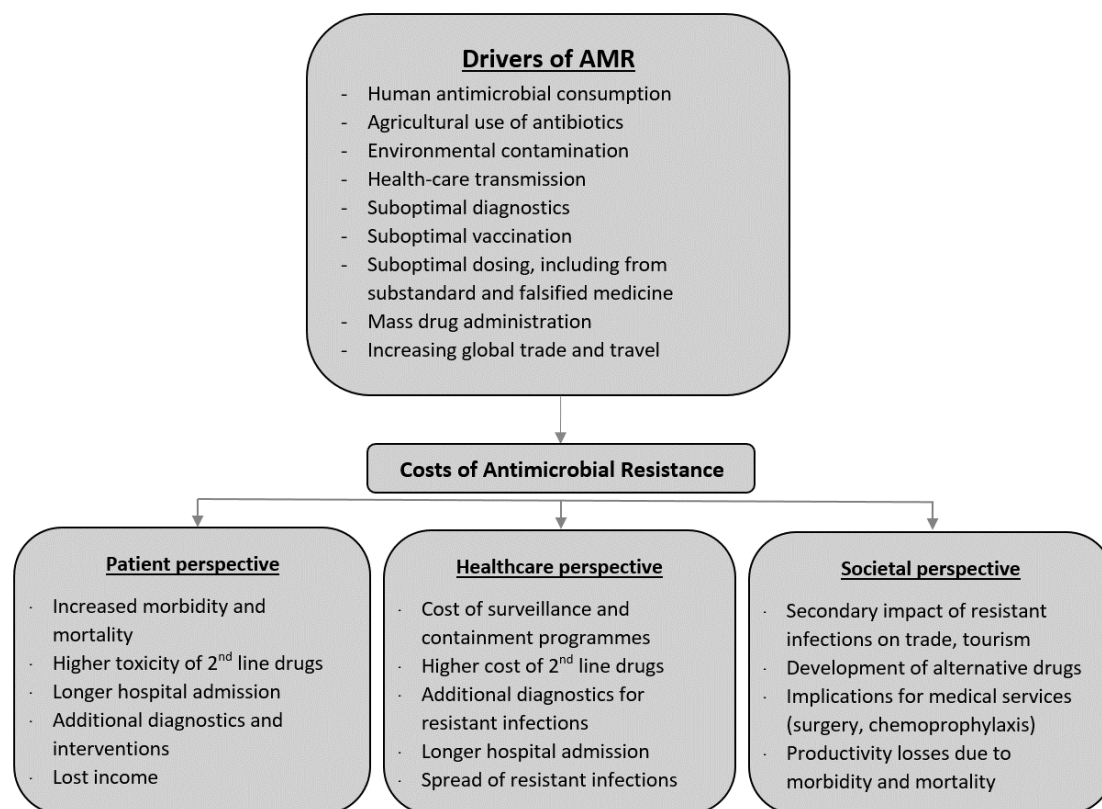

Treatment of resistant infections is associated with higher costs of second line drugs, additional investigations and longer hospitalisation [8]. Other indirect costs associated with AMR include productivity losses due to excess morbidity and premature mortality. These costs can be conceptualised as a negative externality to antimicrobial consumption [9–13] accrued by all members of society, and not reflected in the market prices of antimicrobials.

In addition to curative use in infectious diseases, antimicrobials are widely used presumptively, in mass treatment programmes (anti-helminths, antimalarials), and as prophylactics in surgical procedures and alongside immunocompromising treatments [3,14]. Many other healthcare interventions such as

vaccinations, diagnostics and treatments for infectious diseases affect antimicrobial consumption, and consequently increase or decrease the risks of AMR. Most economic evaluations of such interventions, however, do not internalise the potential costs of AMR in the analyses, leaving policymakers to intuitively consider these alongside more tangible costs and benefits in the evaluation [8,15]. This, in turn, can result in uninformed decision making, as the cost of AMR is likely to be either under- or over-estimated by policymakers, if it is considered at all [8,15,16].

Coast et al. argued that the omission of the cost of AMR in economic evaluation is partly explained by the challenges to quantify it [8], with extensive uncertainties surrounding resistance mechanisms, paucity and poor quality of relevant data, and other methodological challenges [9,17]. The (mis)perception that the impact of AMR will be felt in future years might also deter analysts from including them in the evaluation, assuming policymakers operate with a myopic view of health gains and costs.

Policymakers and key stakeholders, however, are increasingly concerned with AMR, with unprecedented funding being allocated to interventions to mitigate its impact. In late 2016 the UN General Assembly held a special meeting on the topic, passing a unanimous resolution from Member States committing to adopt such measures [18]. Without enumerating the cost of AMR associated per antimicrobial consumed, it will be difficult to determine the allocative efficiency of these investments, and particularly so in LMICs with more tangible causes of ill-health to invest in.

Therefore, despite the challenges, there is a clear need for costing the negative externality of AMR that can be affixed to the consumption of antimicrobials. The rare occasions where this has been done indicate the importance of such efforts. For example, the use of a single defined daily dose of a 2<sup>nd</sup> or 3<sup>rd</sup> generation cephalosporin was associated with €5 and €15 respectively in costs of AMR, in a German hospital setting [12].

The current analysis produced a menu of economic costs of AMR per antibiotic consumed for different drug classes, stratified into low/middle income countries (LMICs) and high income country settings. The output can be applied in future economic evaluations of interventions that involve or affect antibiotic consumption.

## Methodology

### Economic costs of resistance

The economic cost of AMR is narrowly defined as the incremental cost of treating hospitalised patients with resistant infections as compared with sensitive ones, and the indirect productivity losses due to excess mortality attributable to resistant infections. We estimate these direct and indirect costs for the following key pathogens:

1. *Staphylococcus aureus* (*S. aureus*) resistant to Oxacillin
2. *Escherichia coli* (*E. coli*) resistant to 3<sup>rd</sup> generation cephalosporin
3. *Klebsiella pneumoniae* (*K. pneumoniae*) resistant to 3<sup>rd</sup> generation cephalosporin
4. *Acinetobacter baumannii* (*A. baumannii*) resistant to carbapenems
5. *Pseudomonas aeruginosa* (*P. aeruginosa*) resistant to carbapenems
6. *Streptococcus pneumoniae* (*S. pneumoniae*) resistant to penicillin.

We limit our calculations to Thailand and the United States to represent low/middle and high income country settings, respectively.

**Direct cost to the provider:** We use the product of the number of resistant infections due to each of the above organisms, and the cost attributable to resistance in the respective infections (Table 1). The number of infections and deaths per infection for the USA was obtained from the Center for Disease Control and Prevention (CDC) [19]. The unit cost per infection was obtained from a detailed costing analysis carried out in a US hospital [20]. We used the most conservative estimates that adjust AMR attributable costs for sensitive infections, severity and ICU admission. As no estimate was available for the cost of *S. pneumoniae* resistant infections, we derived it using the excess medical cost per year and the number of infections from the CDC [19]. These costs were inflation adjusted to 2016 USD using the US consumer price index [21].

Table 1– Incidence and mortality of resistant infections per 100,000 in Thailand and the USA, and the direct cost per infection.

|                      | Mortality per 100,000 |     | Infections per 100,000 |       | Direct medical costs per infection |           |
|----------------------|-----------------------|-----|------------------------|-------|------------------------------------|-----------|
|                      | Thailand              | USA | Thailand               | USA   | Thailand (USD)                     | USA (USD) |
| <i>S. aureus</i>     | 4.1                   | 3.5 | 29.5                   | 25.2  | 1,977                              | 12,449    |
| <i>E. coli</i>       | 0.9                   | 0.2 | 13.3                   | 3.3   | 1,150                              | 3,108     |
| <i>K. pneumoniae</i> | 0.4                   | 0.5 | 6.5                    | 7.8   | 1,150                              | 3,108     |
| <i>A. baumannii</i>  | 22.4                  | 0.2 | 326.9                  | 2.3   | 1,944                              | 46,438    |
| <i>P. aeruginosa</i> | 0.4                   | 0.1 | 6.1                    | 2.1   | 1,796                              | 46,438    |
| <i>S. pneumoniae</i> | NA                    | 2.2 | NA                     | 376.3 | NA                                 | 97        |

Estimates for the number of resistant infections in hospitalised patients in Thailand were available from a 2012 study of the burden of AMR in Thai hospitals [22]. The total number of AMR attributed deaths in this paper was estimated at 38,000 but we opted for more conservative estimates in a recent study reporting approximately 19,000 AMR attributable deaths annually [23]. We obtained the unit cost per infection from the first of these studies. These costs included only those for antibiotics, therefore we used the estimated excess length of stay of 9.2 days from the US study and applied a cost of \$38 per bed-day in a secondary hospital in Thailand [24,25]. Costs were adjusted to 2016 USD by converting to USD at the year they were reported and inflation adjusted using the World Bank GDP deflator for Thailand.

**Indirect cost:** Mortality figures were converted into productivity losses taking the human capital approach, by multiplying them by an assumed 10 productive life years lost per death, based on a study of survival post ICU admission in Thailand, which reported similar results for high income settings [25], with a sensitivity analysis of 5-20 productive years lost per death. The number of years lost was then multiplied by GDP per capita to generate the productivity losses per death [26].

### Resistance modulating factor (RMf)

Human antimicrobial consumption is one of a host of factors driving AMR, and different drug classes are implicated in propagating resistance in different pathogens. The Resistance Modulating factor (RMf) approximates the proportional contribution of human antimicrobial consumption towards the total cost of

AMR. Correlation coefficients were calculated to study the strength of the relationship between consumption of antibiotics assumed to be implicated in driving resistance in each pathogen, and the rates of resistance observed to their first line treatments. It was assumed that each drug class contributed equally towards resistance [27,28] (Table 2).

Table 2 - Drug classes implicated in increasing the risk of resistance in each organism

| Organism (Resistance)              | Drug classes implicated for propagating the respective resistance |                |               |                  |                  |            |            |
|------------------------------------|-------------------------------------------------------------------|----------------|---------------|------------------|------------------|------------|------------|
| <i>S.aureus</i> (Oxacillin)        | Quinolones                                                        | Cephalosporins |               | BSP <sup>a</sup> | NSP <sup>a</sup> |            | Macrolides |
| <i>E. coli</i> (3GC <sup>a</sup> ) | Quinolones                                                        | Cephalosporins | Glycopeptides | BSP              | Aminoglycoside   |            | Macrolides |
| <i>K. pneumoniae</i> (3GC)         | Quinolones                                                        | Cephalosporins | Glycopeptides | BSP              | Aminoglycoside   | Carbapenem | Macrolides |
| <i>A. baumannii</i> (Carbapenem)   | Quinolones                                                        | Cephalosporins | Glycopeptides | BSP              | Aminoglycoside   | Carbapenem |            |
| <i>P.aeruginosa</i> (Carbapenem)   | Quinolones                                                        | Cephalosporins | Glycopeptides | BSP              | Aminoglycoside   | Carbapenem |            |
| <i>S.pneumonia</i> (Penicillin)    |                                                                   | Cephalosporins |               | BSP              |                  |            | Macrolides |

<sup>a</sup> BSP – Broad Spectrum Penicillin, NSP – Narrow spectrum penicillin, 3GC – 3<sup>rd</sup> Generation Cephalosporin.

Data points for consumption and resistance between 2008 and 2015 were obtained from 44 countries and included total consumption in both hospital and community settings [29]. The ecological association was tested using Pearson's correlation coefficients on log transformations of the data. The lower and upper bounds of the 95% coefficient confidence intervals (CI) were used in the sensitivity analysis.

### Model for the economic cost of AMR per antibiotic consumed

Putting together the costs of AMR, the RMf and the consumption of antibiotics that drive resistance in each pathogen, we established the cost of AMR attributable to the use of a Standard Unit (SU) and a full course of eight antibiotic drug classes, in the context of Thailand and the USA. One SU is a measure of volume based on the smallest identifiable dose given to a patient, dependent on the pharmaceutical form (a pill, capsule, tablet or ampoule) [30]. For example, the cost of AMR in MRSA per SU of quinolones, cephalosporins, glycopeptides, broad spectrum penicillins and narrow spectrum penicillins that are implicated in propagating resistance in *S. aureus*, were calculated as shown in Box 1.

**Societal cost per antibiotic consumed (country specific) due to *S. aureus***

Total economic loss due to MRSA\* RMf for *S. aureus*

Total consumption of antibiotics implicated in propagating MRSA (quinolones,  
cephalosporins, BSP, NSP, Macrolides)

**Box 1. The model to calculate economic cost of AMR.**

The resulting economic costs per SU of antibiotic consumed in each pathogen were then aggregated to calculate the cumulative economic cost per antibiotic consumed for each drug class in each country, including only the infections in which the particular drug class was assumed to propagate resistance.

The outputs of the model are also presented in terms of the cost of AMR per full course of treatment. Table 3 shows examples of the number of SUs per adult full course of antibiotics for listed indications according to the British National formulary (BNF) [31]. The calculation of SUs per course for all classes is presented in Supplementary Table 1.

Table 3 - Example of standard units (SU) in a prescribed course of antibiotic

| Antibiotic (Drug class)                  | Indication                                                  | SUs in a prescribed course |
|------------------------------------------|-------------------------------------------------------------|----------------------------|
| Levofloxacin (Quinolone)                 | Community acquired pneumoniae                               | 28                         |
| Ceftriaxone (Cephalosporin)              | Syphilis                                                    | 14                         |
| Co-amoxiclav (Broad spectrum penicillin) | Severe dental infections                                    | 15                         |
| Amikacin (Aminoglycoside)                | Serious Gram-negative infections<br>resistant to gentamicin | 20                         |

Data entry, verification and analysis were done in Microsoft Excel 2016. Calculation of the correlation coefficients was done in R version 3.2.2 (R Foundation for Statistical Computing, Vienna, Austria). [A web interface for the model](#) where readers can vary parameter estimates and test model assumptions was developed using R-Shiny (RStudio, Boston, US).



## RESULTS

### The Resistance Modulating factor

As shown in Table 4, a positive relationship was confirmed between consumption of antibiotics assumed to be implicated in resistance, and the average resistance rates in all pathogens with correlation coefficients ranging from 0.27 in *E. coli* ( $p=0.07$ ) to 0.62 in *S. pneumoniae* ( $p=0.0001$ ).

Table 4 - Pearson's correlation coefficient showing ecological associations between average consumption (2008-14) of drug classes implicated in driving resistance in each organism and corresponding resistance (2008-15).

| Organism / resistance                                          | Correlation coefficient (95% CI, p-values) |
|----------------------------------------------------------------|--------------------------------------------|
| <i>S. aureus</i> resistant to oxacillin                        | 0.37 (0.08 - 0.61, $p = 0.016$ )           |
| <i>E. coli</i> resistant to 3rd generation cephalosporin       | 0.27 (-0.03 - 0.53, $p = 0.07$ )           |
| <i>K. pneumoniae</i> resistant to 3rd generation cephalosporin | 0.35 (0.06 - 0.59, $p = 0.019$ )           |
| <i>A. baumannii</i> resistant to carbapenem                    | 0.45 (0.15 - 0.68, $p = 0.005$ )           |
| <i>P. aeruginosa</i> resistant to carbapenem                   | 0.52 (0.25 - 0.72, $p = 0.0006$ )          |
| <i>S. pneumoniae</i> resistant to penicillin                   | 0.62 (0.35 - 0.79, $p = 0.0001$ )          |

### Direct and indirect costs of AMR

The direct and the indirect cost due to AMR (the numerator in the model) for each of the organisms in the two countries are shown in Tables 5 and 6 respectively.

The direct and indirect annual cost of AMR in Thailand due to MRSA for instance was estimated at \$37 million and \$165 million, respectively. After adjusting for the relative contribution of human consumption using the RMf, the direct and indirect economic loss was estimated to be \$13.7 million and \$61 million, respectively.

Table 5 – Direct cost to the providers due to human antibiotic consumption in each resistant infection

|                                                           | THAILAND         |                |                      |                     |                      | USA              |                |                      |                     |                      |                      |
|-----------------------------------------------------------|------------------|----------------|----------------------|---------------------|----------------------|------------------|----------------|----------------------|---------------------|----------------------|----------------------|
|                                                           | <i>S. aureus</i> | <i>E. coli</i> | <i>K. pneumoniae</i> | <i>A. baumannii</i> | <i>P. aeruginosa</i> | <i>S. aureus</i> | <i>E. coli</i> | <i>K. pneumoniae</i> | <i>A. baumannii</i> | <i>P. aeruginosa</i> | <i>S. pneumoniae</i> |
| <b>Total infections</b>                                   | 18,725           | 11,116         | 15,239               | 36,553              | 6,118                | 80,461           | 10,400         | 24,900               | 7,300               | 6,700                | 1,200,000            |
| <b>Cost per infection</b>                                 | 1,977            | 1,150          | 1,150                | 1,944               | 1,796                | 12,449           | 3,108          | 3,108                | 46,438              | 46,438               | 97                   |
| <b>Direct cost (million USD)</b>                          | 37.0             | 12.8           | 17.5                 | 71.0                | 11.0                 | 1001.7           | 32.3           | 77.4                 | 339.0               | 311.1                | 116.9                |
| <b>RMf</b>                                                | 0.37             | 0.27           | 0.35                 | 0.45                | 0.52                 | 0.37             | 0.27           | 0.35                 | 0.45                | 0.52                 | 0.62                 |
| <b>Direct cost due to human consumption (million USD)</b> | 13.7             | 3.5            | 6.1                  | 32.0                | 5.7                  | 370.6            | 8.7            | 27.1                 | 152.5               | 161.8                | 72.5                 |

Table 6 – Productivity losses due to excess deaths attributable to resistant infection

|                                                             | THAILAND         |                |                      |                     |                      | USA              |                |                      |                     |                      |                      |
|-------------------------------------------------------------|------------------|----------------|----------------------|---------------------|----------------------|------------------|----------------|----------------------|---------------------|----------------------|----------------------|
|                                                             | <i>S. aureus</i> | <i>E. coli</i> | <i>K. pneumoniae</i> | <i>A. baumannii</i> | <i>P. aeruginosa</i> | <i>S. aureus</i> | <i>E. coli</i> | <i>K. pneumoniae</i> | <i>A. baumannii</i> | <i>P. aeruginosa</i> | <i>S. pneumoniae</i> |
| <b>Excess deaths</b>                                        | 2,799            | 597            | 288                  | 15,168              | 270                  | 11,285           | 690            | 1,620                | 500                 | 440                  | 7,000                |
| <b>GDP/capita (USD)</b>                                     |                  |                | 5907                 |                     |                      |                  |                |                      | 57466               |                      |                      |
| <b>Indirect Cost (million USD)</b>                          | 165              | 35             | 17                   | 896                 | 15                   | 6,485            | 396            | 931                  | 287                 | 253                  | 4,023                |
| <b>RMf</b>                                                  | 0.37             | 0.27           | 0.35                 | 0.45                | 0.52                 | 0.37             | 0.27           | 0.35                 | 0.45                | 0.52                 | 0.62                 |
| <b>Indirect cost due to human consumption (million USD)</b> | 61               | 9              | 6                    | 403                 | 8                    | 2,399            | 107            | 326                  | 129                 | 131                  | 2,494                |

## Economic cost of AMR per antibiotic consumed

Using the consumption data for each of the relevant drug classes in the denominator, the economic cost of one SU of antibiotic for each pathogen was calculated (Table 7). An antibiotic implicated in driving

resistance only in *S. aureus*, for example would have an economic cost of AMR of \$0.08 per SU in the Thai setting, and if a full course of the same drug consisted of 10 units this would imply a cost of \$0.78.

Table 7 - Cost per Standard Unit (SU) and full course antibiotic consumed per resistant organism

|                                          | Thailand         |                |                      |                     |                      | USA              |                |                      |                     |                      |                      |
|------------------------------------------|------------------|----------------|----------------------|---------------------|----------------------|------------------|----------------|----------------------|---------------------|----------------------|----------------------|
|                                          | <i>S. aureus</i> | <i>E. coli</i> | <i>K. pneumoniae</i> | <i>A. baumannii</i> | <i>P. aeruginosa</i> | <i>S. aureus</i> | <i>E. coli</i> | <i>K. pneumoniae</i> | <i>A. baumannii</i> | <i>P. aeruginosa</i> | <i>S. pneumoniae</i> |
| <b>Direct Cost (million USD)</b>         | 14               | 3              | 6                    | 32                  | 6                    | 371              | 9              | 27                   | 153                 | 162                  | 72                   |
| <b>Indirect Cost (million USD)</b>       | 61               | 10             | 6                    | 403                 | 8                    | 2,399            | 107            | 326                  | 129                 | 131                  | 2,494                |
| <b>Total economic loss (million USD)</b> | 75               | 13             | 12                   | 435                 | 14                   | 2,770            | 116            | 353                  | 282                 | 293                  | 2,566                |
| <b>Antibiotics consumed (million SU)</b> | 965              | 774            | 778                  | 682                 | 682                  | 4,797            | 4,625          | 4,646                | 3,887               | 3,887                | 4,028                |
| <b>Direct cost per SU</b>                | 0.01             | 0.00           | 0.01                 | 0.05                | 0.01                 | 0.08             | 0.00           | 0.01                 | 0.04                | 0.04                 | 0.02                 |
| <b>Indirect Cost per SU</b>              | 0.06             | 0.01           | 0.01                 | 0.59                | 0.01                 | 0.50             | 0.02           | 0.07                 | 0.03                | 0.03                 | 0.62                 |
| <b>Cost per SU</b>                       | 0.08             | 0.02           | 0.02                 | 0.64                | 0.02                 | 0.58             | 0.03           | 0.08                 | 0.07                | 0.08                 | 0.64                 |
| <b>Cost per full course<sup>a</sup></b>  | 0.78             | 0.17           | 0.16                 | 6.38                | 0.21                 | 5.77             | 0.25           | 0.76                 | 0.73                | 0.75                 | 6.37                 |

<sup>a</sup> Assuming a full course comprises of 10 standard units.

As most antibiotics are assumed to drive resistance in more than one infection, the costs need to be aggregated for all relevant pathogens. Therefore, for a broad spectrum penicillin that is assumed to drive resistance in all pathogens, the estimated cost of AMR would be \$7.7 per course of 10 SU. The costs in Table 7 were therefore aggregated for each drug class where it was assumed to drive resistance in each of the organisms. Table 8 presents the cumulative economic cost per SU and per full course by drug class in contributing towards resistance in all organism/drug combinations.

Table 8 - Cumulative cost per SU and per antibiotic course by drug class (USD)

|                 |                   | Quinolones | Cephalosporin | Glycopeptides | BSP <sup>a</sup> | NSP <sup>a</sup> | Carbapenem | Aminoglycoside | Macrolide |
|-----------------|-------------------|------------|---------------|---------------|------------------|------------------|------------|----------------|-----------|
| <b>Thailand</b> | <b>per SU</b>     | 0.8        | 0.8           | 0.7           | 0.8              | 0.1              | 0.7        | 0.7            | 0.1       |
|                 | <b>per course</b> | 21.5       | 10.8          | 38.7          | 11.5             | 3.1              | 14.1       | 13.8           | 0.3       |
| <b>USA</b>      | <b>per SU</b>     | 0.8        | 1.5           | 0.2           | 1.5              | 0.6              | 0.2        | 0.2            | 1.3       |
|                 | <b>per course</b> | 23.1       | 20.5          | 13.9          | 32.0             | 23.1             | 4.7        | 5.0            | 3.9       |

<sup>a</sup>BSP – Broad spectrum penicillin, NSP – Narrow spectrum penicillin.

## Sensitivity analysis

The lower and the upper bound costs of AMR were calculated using the confidence intervals of the RMf (Table 4) and a range of 5-20 productive life years assigned to each excess death for the indirect cost of AMR. Table 9 shows the resulting range of economic cost for a SU and a full course of antibiotic consumed in Thailand and USA. Hence, in Thailand, the best case scenario would see a cost of AMR of \$3.2 per course of co-amoxiclav and the worst would be \$38.4.

Table 9 - Range of economic costs per full course of antibiotics using outputs from the sensitivity analysis (USD).

| <b>Antibiotic (Drug class)</b> | <b>Thailand</b>    |                             | <b>USA</b>         |                        |
|--------------------------------|--------------------|-----------------------------|--------------------|------------------------|
|                                | <b>Cost per SU</b> | <b>Cost per full course</b> | <b>Cost per SU</b> | <b>Cost per course</b> |
| Levofloxacin (Quinolone)       | 0.2 – 2.6          | 5.9– 71.7                   | 0.1 – 2.4          | 3.5 – 67.7             |
| Ceftriaxone (Cephalosporin)    | 0.2 – 2.6          | 2.9– 35.9                   | 0.3 – 4.0          | 4.3 – 56.2             |
| Vancomycin (Glycopeptide)      | 0.2 – 2.3          | 11.2– 130.5                 | 0.1–0.7            | 3.0 – 36.4             |
| Co-amoxiclav (BSP)             | 0.2 – 2.6          | 3.2– 38.4                   | 0.3– 4.0           | 4.6 – 60.3             |
| Phenoxymethylpenicillin (NSP)  | 0.0 – 0.2          | 0.4– 9.3                    | 0.1– 1.8           | 2.8 – 70.7             |
| Meropenem (Carbapenem)         | 0.2 – 2.3          | 4.2– 47.7                   | 0.1– 0.6           | 1.1 – 11.7             |
| Amikacin (Aminoglycoside)      | 0.2 – 2.3          | 4.0– 46.6                   | 0.1– 0.7           | 1.1 – 13.0             |
| Azithromycin (Macrolide)       | 0.0 – 0.3          | 0.0 – 0.95                  | 0.3 – 3.7          | 0.8 – 11.1             |

## Discussion

Evidence-based policy draws on economic evaluation to allocate available resources most efficiently [32], but this is entirely dependent on the inclusion of all pertinent costs and benefits associated with the interventions in the analyses. This is, to our knowledge, a first attempt at estimating the costs of AMR per antibiotic consumed by drug class and across national income brackets. We chose simple and transparent methods and restricted our assessment of the costs of AMR to the current burden, rather than more uncertain future projections, and to tangible factors including only direct medical hospital costs and productivity losses due to AMR attributable deaths. Even within this restrictive framework there is much uncertainty surrounding interactions between antibiotic consumption, development of resistance and its economic implications, but our underlying assumptions and parameter estimates were conservative.

The cost per SU of antibiotic differed between the USA and Thailand primarily as a result of higher direct medical costs and GDP per capita and lower per capita consumption of antibiotics in the USA, and higher incidence of AMR deaths in Thailand. Different epidemiological profiles such as the high burden of *Acinetobacter* associated mortality in Thailand as compared with the USA also explain the differences; these trends vary geographically and by income levels.

The costs for different drug classes also varied substantially; this is driven primarily by the degree to which they were assumed to propagate resistance in the selected infections (e.g. NSPs were only assumed to drive resistance in *S. aureus*, while cephalosporin were implicated in resistance in all pathogens in the analysis). The costs per full course were mostly determined by the number of SU per course, which for glycopeptides for instance were high (a full course of vancomycin being 56 units - 4 daily over 14 days, as compared with 3 once daily units for a full course of azithromycin).

Very few attempts have been made to quantify the cost of AMR per antibiotic consumed and internalise them in evaluations of interventions that involve or affect the use of antimicrobials. A recent study by Oppong et al. [33] was one of the first attempts to do so in an evaluation focusing on antibiotic treatment, demonstrating the decisive impact this had on outcomes. An earlier study evaluating the cost-effectiveness of malaria rapid tests used a similarly crude estimate for the cost of antimalarial resistance, also showing the large impact this had in swaying results and conclusions [34].

Several studies have explored the correlation between antimicrobial consumption and resistance [35–38]. The correlation coefficients in the current study are smaller than prior estimates. For example, the coefficient for resistance in *E. coli* in this analysis was 0.27 (Table 4) in comparison to 0.74 from Goossens et al. [35]. This could be explained by the latter using 14 European countries in contrast to 44 countries from different regions in our study. The smaller coefficients imply a conservative assessment of the cost of AMR attributable to human antibiotic consumption.

Kaier et al. derived measures of association between antibiotic consumption and resistance from a time-series analysis using a multivariate regression model with different drug classes [39]. This would be a better approach for calculating the RMf, rather than the ecological associations used here. We were restricted however by limited annual consumption data to only 10 years and even sparser and more heterogeneous resistance data.

There were many assumptions and limitations in the analysis (see Supplementary Table 2). One key limitation was the inclusion of a limited number of organisms, while consumption of the same antibiotics could drive resistance in other organisms with additional costs. This and other listed limitations result in a conservative estimate of the economic costs of AMR in our model.

Taking the human capital approach to productivity losses results in much higher estimates than would have been derived using friction costs; given the context of this analysis, trying to capture the full societal costs of AMR, this was deemed appropriate. This is essentially equivalent to the widespread use of GDP/capita as a proxy for the ceiling ratio in cost-effectiveness analyses to classify interventions as cost-effective.

The direct medical costs assigned to resistant infections were derived from a single study in each country [20]; the Thai study used rudimentary costing methods, largely relying on expert opinion, while the US study relied on detailed micro-costing, and has since formed the basis for much of the cited costs of AMR. The study provided different estimates for the costs that are attributable to resistance, of which we selected to use the lowest, controlling for severity, ICU admission and hospital acquired infections, all independently associated with higher costs.

Drug classes implicated in propagation of the respective resistance in the organisms were based on limited evidence available [40]. This might explain some apparent anomalies, like the relatively low costs for

NSPs, which were assumed to drive resistance only in *S. aureus*. Another reason for this anomaly relates to the entire framework of the analysis, whereby the cost of AMR is approximated from its current (or recent) estimated burden, rather than projections of what will happen if resistance to last line drugs such as carbapenem were to spread, for which there are alarming early indications. Such an approach is arguably more relevant than focusing on the present burden of AMR, but it requires many strong and contestable assumptions.

These rudimentary estimates for the economic cost of AMR per antibiotic consumed could be improved upon in several ways in future work as better data become available. For instance, the link between human antibiotic consumption and resistance can be disaggregated into hospital vs. community use. The model can be further extended to other organisms including parasites and viruses and their varying distribution in different health sectors and geographical locations (global/regional/country/hospital/community).

Notwithstanding the numerous limitations and need for further refinements of the analysis, the outputs generated emphasise the considerable economic cost associated with AMR per antibiotic consumed, which in some cases are multiple times their purchase cost. Incorporation of these estimates in economic evaluation will better portray the true costs and benefits of interventions that affect the consumption of antibiotics and subsequently affect AMR, and could act as a catalyst for more efficient deployment of interventions to mitigate its effects.

**Funding:**

This work was supported by the Wellcome Trust Major Overseas Programme in SE Asia [grant number 106698/Z/14/Z].

**Conflicts of Interest:**

All authors – No conflict of interest

***Acknowledgements***

*We thank Ms. Nistha Shrestha for her contribution in the data compiling process and Olivier Celhay for developing the web-interface for the model. We also thank Professor Lisa White, Dr Pan-Ngum Wirichada and other members of the Mathematical and Economic Modelling group at the Mahidol Oxford Tropical Medicine Research Unit for their helpful feedback for a presentation of this analysis.*

## References

1. Davies J, Davies D. Origins and evolution of antibiotic resistance. *Microbiol. Mol. Biol. Rev.* **2010**; 74:417–433.
2. Laxminarayan R, Duse A, Wattal C, et al. Antibiotic Resistance - the need for global solutions. *Lancet Infect. Dis.* **2013**; 13:1057–1098.
3. Holmes AH, Moore LSP, Sundsfjord A, et al. Understanding the mechanisms and drivers of antimicrobial resistance. *Lancet* **2015**; 387:176–87.
4. Austin DJ, Kristinsson KG, Anderson RM. The relationship between the volume of antimicrobial consumption in human communities and the frequency of resistance. *Proc. Natl. Acad. Sci. U. S. A.* **1999**; 96:1152–1156.
5. Landers TF, Cohen B, Wittum TE, Larson EL. A review of antibiotic use in food animals: perspective, policy, and potential. *Public Health Rep.* **2012**; 127:4–22.
6. Michael Barza, Gorbach SL. The Need to Improve Antimicrobial Use in Agriculture - Ecological and Human. *Clin. Infect. Dis.* **2002**; 34:S71–S144.
7. Witte W. Medical Consequences of Antibiotic Use in Agriculture. *Science (80-. ).* **1998**; 279:996–997.
8. Coast J, Smith RD, Millar MR. Superbugs: should antimicrobial resistance be included as a cost in economic evaluation? *Health Econ.* **1996**; 5:217–226.
9. Coast J, Smith RD, Millar MR. An economic perspective on policy to reduce antimicrobial resistance. *Soc. Sci. Med.* **1998**; 46:29–38.
10. Smith RD, Yago M, Millar M, Coast J. A Macroeconomic Approach to Evaluating Policies to Contain Antimicrobial Resistance. *Appl. Health Econ. Health Policy* **2006**; 5:55–65.
11. Phelps CE. Bug / Drug Resistance Sometimes Less is More. *Med. Care* **1989**; 27:194–203.
12. Kaier K, Frank U. Measuring the externality of antibacterial use from promoting antimicrobial resistance. *Pharmacoeconomics* **2010**; 28:1123–1128.
13. Elbasha EH. Deadweight loss of bacterial resistance due to overtreatment. *Health Econ.* **2003**; 12:125–138.
14. Do NTT, Ta NTD, Tran NTH, et al. Point-of-care C-reactive protein testing to reduce inappropriate use of antibiotics for non-severe acute respiratory infections in Vietnamese primary health care: a randomised controlled trial. *Lancet Glob. Heal.* **2016**; 4:e633–e641.



15. Coast J, Smith R, Karcher AM, Wilton P, Millar M. Superbugs II: How should economic evaluation be conducted for interventions which aim to contain antimicrobial resistance? *Health Econ.* **2002**; 11:637–647.
16. Gandra S, Barter DM, Laxminarayan R. Economic burden of antibiotic resistance: How much do we really know? *Clin. Microbiol. Infect.* **2014**; 20:973–979.
17. McGowan JE. Economic impact of antimicrobial resistance. *Emerg. Infect. Dis.* **2001**; 7:286–92.
18. Friedrich MJ. UN Leaders Commit to Fight Antimicrobial Resistance. *JAMA* **2016**; 316:1956.
19. Centers for Disease Control and Prevention. Antibiotic resistance threats in the United States, 2013. 2013: 114. Available at: <http://www.cdc.gov/drugresistance/threat-report-2013/index.html>. Accessed 20 December 2016.
20. Roberts RR, Hota B, Ahmad I, et al. Hospital and societal costs of antimicrobial-resistant infections in a Chicago teaching hospital: implications for antibiotic stewardship. *Clin. Infect. Dis.* **2009**; 49:1175–84.
21. US Department of Labor Bureau of Labor Statistics. Inflation calculator. CPI Inflation Calculator. Available at: <https://data.bls.gov/cgi-bin/cpicalc.pl>. Accessed 15 August 2017.
22. Pumart P, Phodha T, Thamlikitkul V, Riewpaiboon A, Prakongsai P, Limwattananon S. Health and economic impacts of antimicrobial resistance in Thailand. *J. Health Serv. Res. Policy* **2012**; 6:352–360.
23. Lim C, Takahashi E, Hongsuwan M, et al. Epidemiology and burden of multidrug-resistant bacterial infection in a developing country. *Elife* **2016**; 5:1–18.
24. Riewpaiboon A. Standard cost lists for health economic evaluation in Thailand. *J. Med. Assoc. Thail.* **2014**; 97:S127-34.
25. Luangasanatip N, Hongsuwan M, Lubell Y, et al. Long-term survival after intensive care unit discharge in Thailand: a retrospective study. *Crit. Care* **2013**; 17:R219.
26. The World Bank DataBank | Explore . Create . Share. Available at: <http://databank.worldbank.org/data/home.aspx>. Accessed 30 July 2016.
27. Tacconelli E, De angelis G, Cataldo MA, Pozzi E, Cauda R. Does antibiotic exposure increase the risk of methicillin-resistant *Staphylococcus aureus* (MRSA) isolation? A systematic review and meta-analysis. *J. Antimicrob. Chemother.* **2008**; 61:26–38.
28. MacAdam H, Zaoutis TE, Gasink LB, Bilker WB, Lautenbach E. Investigating the association between antibiotic use and antibiotic resistance : impact of different methods of categorising prior

- antibiotic use. *Int. J. Antimicrob. Agents* **2006**; 28:325–332.
29. The Center for Disease Dynamics Economics and Policy. ResistanceMap beta. Available at: <http://resistancemap.cddep.org>. Accessed 22 June 2016.
  30. Boeckel TP Van, Gandra S, Ashok A, et al. Global antibiotic consumption 2000 to 2010 : an analysis of national pharmaceutical sales data. *Lancet Infect. Dis.* **2014**; 14:742–750.
  31. NICE National Institute for Health and Care Excellence. British National Formulary. Available at: <http://www.evidence.nhs.uk/formulary/bnf/current/>. Accessed 3 August 2016.
  32. Chisholm D, Evans DB. Economic Evaluation in Health: Saving Money or Improving Care? *J. Med. Econ.* **2007**; 10:325–337.
  33. Opong R, Richard D Smith, Little P, et al. Cost effectiveness of amoxicillin for lower respiratory tract infections in primary care: an economic evaluation accounting for the cost of antimicrobial resistance. *Br. J. Gen. Pract.* **2016**;
  34. Lubell Y, Reyburn H, Mbakilwa H, et al. The impact of response to the results of diagnostic tests for malaria: cost-benefit analysis. *BMJ* **2008**; 336:202–205.
  35. Goossens H, Ferech M, Vander Stichele R, Elseviers M. Outpatient antibiotic use in Europe and association with resistance: A cross-national database study. *Lancet* **2005**; 365:579–587.
  36. Goossens H. Antibiotic consumption and link to resistance. *Clin. Microbiol. Infect.* **2009**; 15:12–15.
  37. Albrich WC, Monnet DL, Harbarth S. Antibiotic Selection Pressure and Resistance in *Streptococcus pneumoniae* and *Streptococcus pyogenes*. *Emerg. Infect. Dis.* **2004**; 10:514–517.
  38. Van De Sande-Bruinsma N, Grundmann H, Verloo D, et al. Antimicrobial drug use and resistance in Europe. *Emerg. Infect. Dis.* **2008**; 14:1722–1730.
  39. Kaier K, Hagist C, Frank U, Conrad A, Meyer E. Two time-series analyses of the impact of antibiotic consumption and alcohol-based hand disinfection on the incidences of nosocomial methicillin-resistant *Staphylococcus aureus* infection and *Clostridium difficile* infection. *Infect. Control Hosp. Epidemiol.* **2009**; 30:346–353.
  40. Tacconelli E. Antimicrobial use: risk driver of multidrug resistant microorganisms in healthcare settings. *Curr Opin Infect Dis* **2009**; 22:352–358.
